# Supplementary material
Source: Springer Nature journal article supplement (https://www.springermedizin.de/resource/supplementary/13037_2011_102_MOESM3_ESM.pdf/9659322)

Science/Teaching

Surgery

Workload

Health

Time

Family/  
Partnership

Income

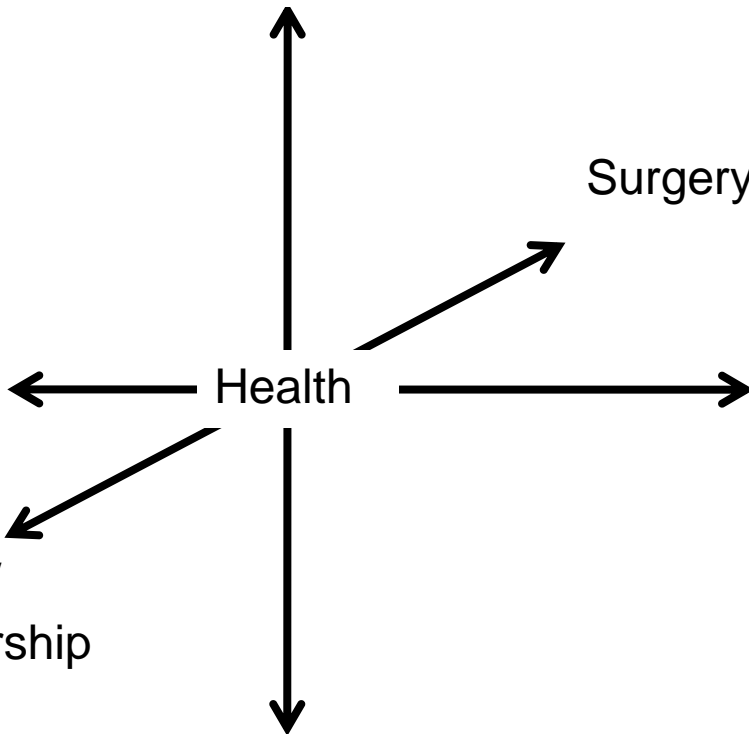

Supplement: MOESM3 [file 9659322]
